# Supplementary material for: BRIGHT Coaching: A Randomized Controlled Trial on the Effectiveness of a Developmental Coach System to Empower Families of Children With Emerging Developmental Delay
Source: PubMed Central journal article supplement (PMC6694748; doi:10.3389/fped.2019.00332), 2019-08-07
Supplement: Image_2.pdf [file Image_2.pdf]

## Appendix 2 The Igloo Platform

The screenshot shows the BRIGHT Coaching Online Resource Library website. The header includes the BRIGHT Coaching logo and a navigation menu with links for Home, Talk, Learn, Share, Online Resource Library, About, and Coach's Corner. The main banner features the title "Online Resource Library" over a background image of hands. Below the banner is a secondary navigation menu with links for Home, British Columbia, Manitoba, Nova Scotia, Quebec, and Disclaimer, along with a settings gear icon. The main content area is divided into two columns. The left column has a section titled "Additional resources" with the instruction "Click on the arrows to open up each section". The right column contains introductory text about the library's purpose and how to use the provincial and topic-based navigation. At the bottom, there are three blue buttons with white text and downward arrows, labeled "Supporting child development", "Understanding child development", and "Evidence and decision-making". An image of hands holding a tablet displaying a library interface is positioned to the right of the introductory text.

**BRIGHT Coaching** Home Talk Learn Share **Online Resource Library** About Coach's Corner

# Online Resource Library

Home British Columbia Manitoba Nova Scotia Quebec Disclaimer

### Additional resources

Click on the arrows to open up each section

This Online Resource Library builds on the BRIGHT Coaching topics to give you more information, ideas, and things to think about.

If you click on **your province above**, you will find a list of local resources and supports in your area.

If you click on **the arrows below**, you'll open up different sections of the Online Resource Library. These sections were put together by the BRIGHT Coaching research team. Each section goes into a different topic that might help you on your journey. They can also be 'launching pads' for you as you begin your own search for online resources.

We link to these websites, but we as the BRIGHT Coaching team did not create the websites. We encourage you to read our [disclaimers](#) before you click on any of the links in the Online Resource Library and elsewhere on the BRIGHT Coaching website or coaching materials.

**Supporting child development** ▾

**Understanding child development** ▾

**Evidence and decision-making** ▾



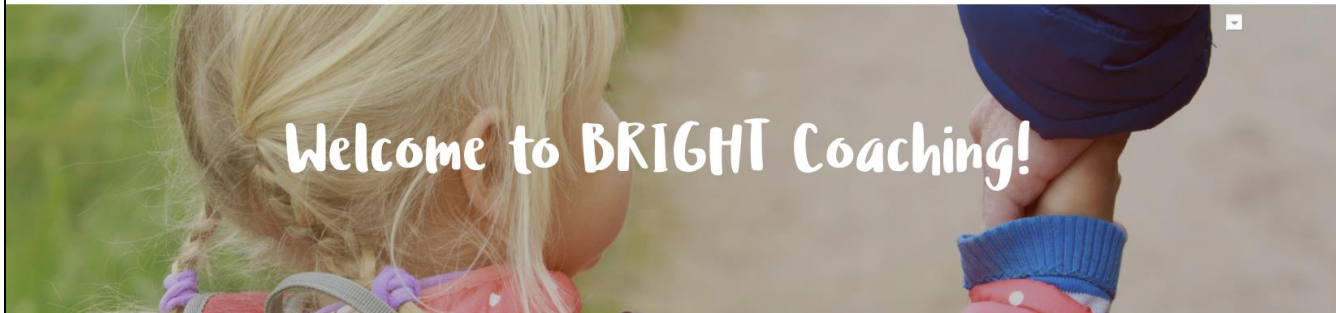

 **TALK**

CONTACT YOUR COACH, SET UP YOUR NEXT COACHING SESSION

 **LEARN**

READ THROUGH COACHING TOPICS, ACCESS ADDITIONAL RESOURCES

 **SHARE**

CONNECT WITH OTHER PARENTS, SHARE EXPERIENCES & QUESTIONS

### I want to...

- [Read my next coaching topics](#)
- [Message my coach](#)
- [Connect with other parents](#)
- [Find help for an emergency](#)

### Welcome to the BRIGHT Coaching website!

[Bahar Kasaai](#)

Here for the first time? Check out the *Tutorial Video* below about how to navigate the site!

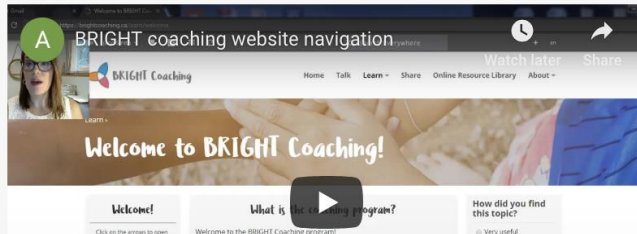

Click on the arrows to open

Welcome to the BRIGHT Coaching program!

How did you find this topic?

Very useful

### Members

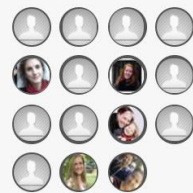

[View All](#)

[Learn](#) >

# Topic 2: Understanding child development

## Welcome to Topic 2!

Click on the arrows to open up each section

[Download PDF](#)

### What is this topic about?

*What does 'child development' mean?*

This topic will help you further develop skills to discuss child development with the professionals who will be providing care and services for your child. It is part of the 'promoting child development' theme.

Your child's service providers (including doctors, nurses, social workers, therapists, or other professionals) use a certain language to describe child development. Knowing this language will help you talk with these service providers. It can even help you get the right services and care for your child.

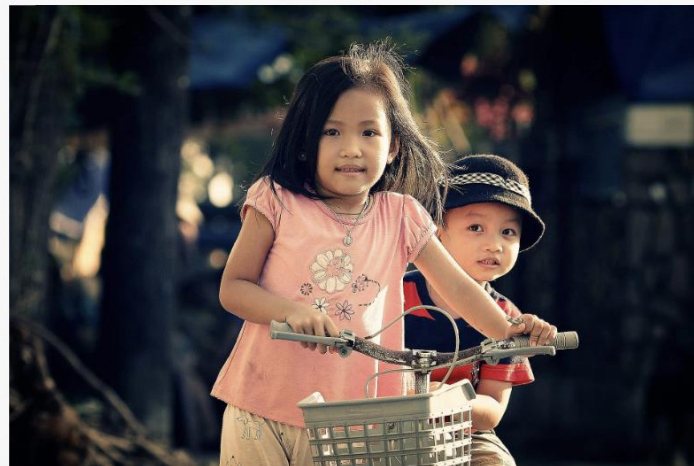

### How did you find this topic?

- Very useful
- Somewhat useful
- Not very useful

[Vote](#) [View Results](#)


**BRIGHT Coaching**

[Home](#)
[Talk](#)
[Learn ▾](#)
[Share](#)
[Online Resource Library](#)
[About ▾](#)
[Coach's Corner ▾](#)



# Talk



**Welcome!**  
Here you can connect with your coach, schedule your next session and meet the other coaches.

### Connect with your coach

- Quebec Coach
- British Columbia Coach
- Manitoba Coach
- Nova Scotia Coach

## Meet your coaches!

### Coach blog



**Amélie Brown - Lead Coach - Montreal**  
Amélie is the Lead Coach in the BRIGHT Coaching research team. She has over 12 years of experience working in mental health and youth services as a Social Worker in the public service setting. She has a Bachelor's degree in Social Work (2006), a Certificate in Psychology (2010), and a Master's degree in Couple and Family Therapy from McGill (2016). Amélie trains and supervises the four coaches through their interactions with the participants. As a health care professional, Amélie will ensure that the coaches are well supported and able to provide high-quality coaching by focusing on the needs of the participants and their families.



**Allison Mounsey - British Columbia**  
Allison is the BRIGHT Coach for British Columbia and lives in the Lower Mainland of BC. She is a Registered Clinical Social Worker who brings 20 years of experience working with children and families. Her previous work experience includes BC Children's Hospital and Sunny Hill Health Centre for Children as well as having a small private practice working in adoption. She has worked with families who have children with a wide range of developmental, behavioural and mental health challenges, including at an assessment and diagnostic clinic for children with developmental disabilities.

### Going through a Family or Personal Crisis?

### Coaches

-  Amélie Brown, BRIGHT Coaching Team
-  Tamara Szulzinger
-  Allison Mounsey
-  Allyson Baker
-  Ally Haley
